# Supplementary material
Source: Springer Nature journal article supplement (https://www.springermedizin.de/resource/supplementary/12879_2012_2148_MOESM3_ESM.pdf/9443756)

# Cultured

no

yes

Dom

Maj

Minor

**Abundance.Class**

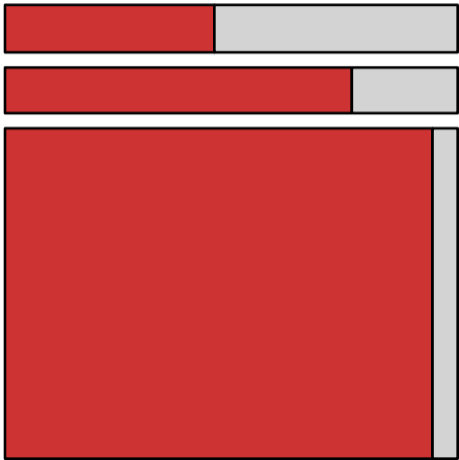

Supplement: MOESM3 [file 9443756]
